# Supplementary material
Source: Springer Nature journal article supplement (https://www.springermedizin.de/resource/supplementary/12913_2008_1011_MOESM2_ESM.pdf/9536132)
Supplement: MOESM2 [file 9536132]

## SECTIE 1

Elke vraag in deze sectie heeft betrekking op de behandeling van uw patiënten met Type 2 diabetes. Omcirkel voor elke vraag alstublieft telkens één nummer dat het meeste met uw mening overeenkomt, van 1 (geheel mee oneens) tot 7 (geheel mee eens) met de tussenliggende stappen.

|     |                                                                                                      |                            |   |   |   |   |                        |   |   |                         |
|-----|------------------------------------------------------------------------------------------------------|----------------------------|---|---|---|---|------------------------|---|---|-------------------------|
|     |                                                                                                      | <i>Geheel mee oneens</i>   |   |   |   |   | <i>Geheel mee eens</i> |   |   |                         |
| 1.  | Mensen die belangrijk voor mij zijn vinden dat ik de bloeddruk van mijn diabetespatiënten moet meten | 1                          | 2 | 3 | 4 | 5 | 6                      | 7 |   |                         |
| 2.  | Mijn professionele organisatie vindt dat ik de bloeddruk van mijn diabetespatiënten moet meten       | 1                          | 2 | 3 | 4 | 5 | 6                      | 7 |   |                         |
| 3.  | Het meten van de bloeddruk van mijn diabetespatiënten is moeilijk                                    | 1                          | 2 | 3 | 4 | 5 | 6                      | 7 |   |                         |
| 4.  | Ik ben van plan om de bloeddruk te meten van al mijn diabetespatiënten tijdens hun volgende consult  | 1                          | 2 | 3 | 4 | 5 | 6                      | 7 |   |                         |
| 5.  | Ik verwacht de bloeddruk te meten van al mijn diabetespatiënten tijdens hun volgende consult         | 1                          | 2 | 3 | 4 | 5 | 6                      | 7 |   |                         |
| 6.  | In het algemeen is volgens mij het meten van de bloeddruk van mijn diabetespatiënten:                | <i>Schadelijk</i>          | 1 | 2 | 3 | 4 | 5                      | 6 | 7 | <i>Nuttig</i>           |
| 7.  |                                                                                                      | <i>Prettig</i>             | 1 | 2 | 3 | 4 | 5                      | 6 | 7 | <i>Niet prettig</i>     |
| 8.  |                                                                                                      | <i>Verkeerd om te doen</i> | 1 | 2 | 3 | 4 | 5                      | 6 | 7 | <i>Juist om te doen</i> |
| 9.  |                                                                                                      | <i>Goed handelen</i>       | 1 | 2 | 3 | 4 | 5                      | 6 | 7 | <i>Slecht handelen</i>  |
|     |                                                                                                      | <i>Geheel mee oneens</i>   |   |   |   |   | <i>Geheel mee eens</i> |   |   |                         |
| 10. | Ik wil de bloeddruk meten van al mijn diabetespatiënten tijdens hun volgende consult                 | 1                          | 2 | 3 | 4 | 5 | 6                      | 7 |   |                         |
| 11. | Andere huisartsen meten de bloeddruk van hun diabetespatiënten niet                                  | 1                          | 2 | 3 | 4 | 5 | 6                      | 7 |   |                         |
| 12. | Of ik de bloeddruk van mijn diabetespatiënten meet is geheel mijn zaak                               | 1                          | 2 | 3 | 4 | 5 | 6                      | 7 |   |                         |
| 13. | In het algemeen denk ik niet dat ik de bloeddruk van mijn diabetespatiënten kan meten                | 1                          | 2 | 3 | 4 | 5 | 6                      | 7 |   |                         |

|    |                                                                                                         | <i>Geheel<br/>mee oneens</i> |   |   |   |   | <i>Geheel<br/>mee eens</i> |   |
|----|---------------------------------------------------------------------------------------------------------|------------------------------|---|---|---|---|----------------------------|---|
| 1. | Mensen die belangrijk voor mij zijn vinden dat ik de voeten van mijn diabetespatiënten moet controleren | 1                            | 2 | 3 | 4 | 5 | 6                          | 7 |
| 2. | Mijn professionele organisatie vindt dat ik de voeten van mijn diabetespatiënten moet controleren       | 1                            | 2 | 3 | 4 | 5 | 6                          | 7 |
| 3. | Het controleren van de voeten van mijn diabetespatiënten is moeilijk                                    | 1                            | 2 | 3 | 4 | 5 | 6                          | 7 |
| 4. | Ik ben van plan om de voeten te controleren van al mijn diabetespatiënten tijdens hun volgende consult  | 1                            | 2 | 3 | 4 | 5 | 6                          | 7 |
| 5. | Ik verwacht de voeten te controleren van al mijn diabetespatiënten tijdens hun volgende consult         | 1                            | 2 | 3 | 4 | 5 | 6                          | 7 |

---

|    |                                                                                          |                            |   |   |   |   |   |   |   |                         |
|----|------------------------------------------------------------------------------------------|----------------------------|---|---|---|---|---|---|---|-------------------------|
| 6. | In het algemeen is volgens mij het controleren van de voeten van mijn diabetespatiënten: | <i>Schadelijk</i>          | 1 | 2 | 3 | 4 | 5 | 6 | 7 | <i>Nuttig</i>           |
| 7. |                                                                                          | <i>Prettig</i>             | 1 | 2 | 3 | 4 | 5 | 6 | 7 | <i>Niet prettig</i>     |
| 8. |                                                                                          | <i>Verkeerd om te doen</i> | 1 | 2 | 3 | 4 | 5 | 6 | 7 | <i>Juist om te doen</i> |
| 9. |                                                                                          | <i>Goed handelen</i>       | 1 | 2 | 3 | 4 | 5 | 6 | 7 | <i>Slecht handelen</i>  |

---

|     |                                                                                          | <i>Geheel<br/>mee oneens</i> |   |   |   |   | <i>Geheel<br/>mee eens</i> |   |
|-----|------------------------------------------------------------------------------------------|------------------------------|---|---|---|---|----------------------------|---|
| 10. | Ik wil de voeten controleren van al mijn diabetespatiënten tijdens hun volgende consult  | 1                            | 2 | 3 | 4 | 5 | 6                          | 7 |
| 11. | Andere huisartsen controleren de voeten van hun diabetespatiënten niet                   | 1                            | 2 | 3 | 4 | 5 | 6                          | 7 |
| 12. | Of ik de voeten van mijn diabetespatiënten controleer is geheel mijn zaak                | 1                            | 2 | 3 | 4 | 5 | 6                          | 7 |
| 13. | In het algemeen denk ik niet dat ik de voeten van mijn diabetespatiënten kan controleren | 1                            | 2 | 3 | 4 | 5 | 6                          | 7 |

---

|    |                                                                                                          | <i>Geheel<br/>mee oneens</i> |   |   |   | <i>Geheel<br/>mee eens</i> |   |   |  |
|----|----------------------------------------------------------------------------------------------------------|------------------------------|---|---|---|----------------------------|---|---|--|
| 1. | Mensen die belangrijk voor mij zijn vinden dat ik statines moet voorschrijven aan mijn diabetespatiënten | 1                            | 2 | 3 | 4 | 5                          | 6 | 7 |  |
| 2. | Mijn professionele organisatie vindt dat ik statines moet voorschrijven aan mijn diabetespatiënten       | 1                            | 2 | 3 | 4 | 5                          | 6 | 7 |  |
| 3. | Het voorschrijven van statines aan mijn diabetespatiënten is moeilijk                                    | 1                            | 2 | 3 | 4 | 5                          | 6 | 7 |  |
| 4. | Ik ben van plan om statines voor te schrijven aan al mijn diabetespatiënten tijdens hun volgende consult | 1                            | 2 | 3 | 4 | 5                          | 6 | 7 |  |
| 5. | Ik verwacht statines voor te schrijven aan al mijn diabetespatiënten tijdens hun volgende consult        | 1                            | 2 | 3 | 4 | 5                          | 6 | 7 |  |

---

|    |                                                                                           |                            |   |   |   |   |   |   |   |                         |
|----|-------------------------------------------------------------------------------------------|----------------------------|---|---|---|---|---|---|---|-------------------------|
| 6. | In het algemeen is volgens mij het voorschrijven van statines aan mijn diabetespatiënten: | <i>Schadelijk</i>          | 1 | 2 | 3 | 4 | 5 | 6 | 7 | <i>Nuttig</i>           |
| 7. |                                                                                           | <i>Prettig</i>             | 1 | 2 | 3 | 4 | 5 | 6 | 7 | <i>Niet prettig</i>     |
| 8. |                                                                                           | <i>Verkeerd om te doen</i> | 1 | 2 | 3 | 4 | 5 | 6 | 7 | <i>Juist om te doen</i> |
| 9. |                                                                                           | <i>Goed handelen</i>       | 1 | 2 | 3 | 4 | 5 | 6 | 7 | <i>Slecht handelen</i>  |

---

|     |                                                                                           | <i>Geheel<br/>mee oneens</i> |   |   |   | <i>Geheel<br/>mee eens</i> |   |   |  |
|-----|-------------------------------------------------------------------------------------------|------------------------------|---|---|---|----------------------------|---|---|--|
| 10. | Ik wil statines voorschrijven aan al mijn diabetespatiënten tijdens hun volgende consult  | 1                            | 2 | 3 | 4 | 5                          | 6 | 7 |  |
| 11. | Andere huisartsen schrijven geen statines voor aan hun diabetespatiënten                  | 1                            | 2 | 3 | 4 | 5                          | 6 | 7 |  |
| 12. | Of ik statines voorschrijf aan mijn diabetespatiënten is geheel mijn zaak                 | 1                            | 2 | 3 | 4 | 5                          | 6 | 7 |  |
| 13. | In het algemeen denk ik niet dat ik statines kan voorschrijven aan mijn diabetespatiënten | 1                            | 2 | 3 | 4 | 5                          | 6 | 7 |  |

---
